# Supplementary material for: Effects of PrObiotics on the Symptoms and Surgical ouTComes after Anterior REsection of Colon Cancer (POSTCARE): A Randomized, Double-Blind, Placebo-Controlled Trial
Source: MDPI journal article supplement (doi:10.3390/jcm9072181), 2020-07-10

## Supplementary Materials

Table S1. Changes in defecatory function based on responses to the anterior resection syndrome questionnaire.

|                           |          |                           | Placebo    | Probiotic  | P-value |                             |            |            |        |
|---------------------------|----------|---------------------------|------------|------------|---------|-----------------------------|------------|------------|--------|
|                           |          |                           | s          |            |         |                             |            |            |        |
|                           |          |                           | Placebo    | Probiotics | P-value |                             |            |            |        |
| Flatus                    | Baseline | No                        | 26 (83.9%) | 18 (62.1%) | 0.0655  |                             |            |            |        |
|                           |          | Less than 1 per week      | 3 (9.7%)   | 3 (10.3%)  |         |                             |            |            |        |
|                           |          | At least 1 per week       | 2 (6.5%)   | 8 (27.6%)  |         |                             |            |            |        |
|                           | Visit 6  | No                        | 21 (67.7%) | 21 (72.4%) | 0.7156  | <b>Worse</b> than baseline  | 9 (29.0%)  | 4 (13.8%)  | 0.2913 |
|                           |          | Less than 1 per week      | 7 (22.6%)  | 4 (13.8%)  |         | <b>Same</b> as baseline     | 19 (61.3%) | 19 (65.5%) |        |
|                           |          | At least 1 per week       | 3 (9.7%)   | 4 (13.8%)  |         | <b>Better</b> than baseline | 3 (9.7%)   | 6 (20.7%)  |        |
|                           | Visit 7  | No                        | 17 (56.7%) | 20 (69.0%) | 0.6995  | <b>Worse</b> than baseline  | 12 (40.0%) | 4 (13.8%)  | 0.0331 |
|                           |          | Less than 1 per week      | 8 (26.7%)  | 5 (17.2%)  |         | <b>Same</b> as baseline     | 15 (50.0%) | 16 (55.2%) |        |
|                           |          | At least 1 per week       | 5 (16.7%)  | 4 (13.8%)  |         | <b>Better</b> than baseline | 3 (10.0%)  | 9 (31.0%)  |        |
| Accidental liquid leakage | Baseline | No                        | 22 (70.9%) | 21 (72.4%) | 0.4966  |                             |            |            |        |
|                           |          | Less than 1 per week      | 7 (22.6%)  | 4 (13.8%)  |         |                             |            |            |        |
|                           |          | At least 1 per week       | 2 (6.5%)   | 4 (13.8%)  |         |                             |            |            |        |
|                           | Visit 6  | No                        | 15 (48.4%) | 20 (69.0%) | 0.3240  | <b>Worse</b> than baseline  | 10 (32.3%) | 6 (20.7%)  | 0.5943 |
|                           |          | Less than 1 per week      | 12 (38.7%) | 7 (24.1%)  |         | <b>Same</b> as baseline     | 16 (51.6%) | 18 (62.1%) |        |
|                           |          | At least 1 per week       | 4 (12.9%)  | 2 (6.9%)   |         | <b>Better</b> than baseline | 5 (16.1%)  | 5 (17.2%)  |        |
|                           | Visit 7  | No                        | 22 (73.3%) | 22 (75.9%) | 0.3678  | <b>Worse</b> than baseline  | 5 (16.7%)  | 5 (17.2%)  | 0.9704 |
|                           |          | Less than 1 per week      | 8 (26.7%)  | 5 (17.2%)  |         | <b>Same</b> as baseline     | 18 (60.0%) | 18 (62.1%) |        |
|                           |          | At least 1 per week       | 0 (0.0%)   | 2 (6.9%)   |         | <b>Better</b> than baseline | 7 (23.3%)  | 6 (20.7%)  |        |
| Frequency of defecation   | Baseline | More than 7 times per day | 1 (3.2%)   | 1 (3.5%)   | 0.7538  |                             |            |            |        |
|                           |          | 4–7 times per day         | 1 (3.2%)   | 3 (10.3%)  |         |                             |            |            |        |
|                           |          | 1–3 times per day         | 25 (80.7%) | 20 (69.0%) |         |                             |            |            |        |
|                           |          | Less than 1 per day       | 4 (12.9%)  | 5 (17.2%)  |         |                             |            |            |        |
|                           | Visit 6  | More than 7 times per day | 2 (6.5%)   | 4 (13.8%)  | 0.3268  |                             |            |            |        |
|                           |          | 4–7 times per day         | 8 (25.8%)  | 11 (37.9%) |         | <b>Worse</b> than baseline  | 10 (32.3%) | 14 (48.3%) | 0.3787 |
|                           |          |                           |            |            |         |                             |            |            |        |

|                                 |          |                           |            |            |               |                             |            |            |        |
|---------------------------------|----------|---------------------------|------------|------------|---------------|-----------------------------|------------|------------|--------|
|                                 |          | 1–3 times per day         | 19 (61.3%) | 11 (37.9%) |               | <b>Same</b> as baseline     | 20 (64.5%) | 13 (44.8%) |        |
|                                 |          | Less than 1 per day       | 2 (6.5%)   | 3 (10.3%)  |               | <b>Better</b> than baseline | 1 (3.2%)   | 2 (6.90%)  |        |
| Visit 7                         |          | More than 7 times per day | 2 (6.7%)   | 3 (10.3%)  | 0.8846        |                             |            |            |        |
|                                 |          | 4–7 times per day         | 9 (30.0%)  | 7 (24.1%)  |               | <b>Worse</b> than baseline  | 13 (43.3%) | 14 (48.3%) | 0.7632 |
|                                 |          | 1–3 times per day         | 17 (56.7%) | 18 (62.1%) |               | <b>Same</b> as baseline     | 16 (53.3%) | 13 (44.8%) |        |
|                                 |          | Less than 1 per day       | 2 (6.7%)   | 1 (3.5%)   |               | <b>Better</b> than baseline | 1 (3.3%)   | 2 (6.9%)   |        |
| Incomplete defecation sensation | Baseline | No                        | 26 (83.9%) | 16 (55.2%) | <b>0.0540</b> |                             |            |            |        |
|                                 |          | Less than 1 per week      | 4 (12.9%)  | 8 (27.6%)  |               |                             |            |            |        |
|                                 |          | At least 1 per week       | 1 (3.2%)   | 5 (17.2%)  |               |                             |            |            |        |
|                                 | Visit 6  | No                        | 11 (35.5%) | 13 (44.8%) | 0.5708        | <b>Worse</b> than baseline  | 16 (51.6%) | 9 (30.0%)  | 0.2078 |
|                                 |          | Less than 1 per week      | 9 (29.0%)  | 5 (17.2%)  |               | <b>Same</b> as baseline     | 14 (45.2%) | 17 (58.6%) |        |
|                                 |          | At least 1 per week       | 11 (35.5%) | 11 (37.9%) |               | <b>Better</b> than baseline | 1 (3.2%)   | 3 (10.3%)  |        |
|                                 | Visit 7  | No                        | 12 (40.0%) | 11 (37.9%) | 1.0000        | <b>Worse</b> than baseline  | 15 (50.0%) | 12 (41.4%) | 0.5115 |
|                                 |          | Less than 1 per week      | 9 (30.0%)  | 8 (27.6%)  |               | <b>Same</b> as baseline     | 13 (43.3%) | 12 (41.4%) |        |
|                                 |          | At least 1 per week       | 9 (30.0%)  | 10 (34.5%) |               | <b>Better</b> than baseline | 2 (6.7%)   | 5 (17.2%)  |        |
| Incomplete defecation sensation | Baseline | No                        | 25 (80.7%) | 21 (72.4%) | 0.6794        |                             |            |            |        |
|                                 |          | Less than 1 per week      | 4 (12.9%)  | 4 (13.8%)  |               |                             |            |            |        |
|                                 |          | At least 1 per week       | 2 (6.5%)   | 4 (13.8%)  |               |                             |            |            |        |
|                                 | Visit 6  | No                        | 16 (51.6%) | 17 (58.6%) | 0.6135        | <b>Worse</b> than baseline  | 12 (38.7%) | 7 (24.1%)  | 0.3211 |
|                                 |          | Less than 1 per week      | 9 (29.0%)  | 5 (17.2%)  |               | <b>Same</b> as baseline     | 14 (45.2%) | 19 (65.5%) |        |
|                                 |          | At least 1 per week       | 6 (19.4%)  | 7 (24.1%)  |               | <b>Better</b> than baseline | 5 (16.1%)  | 3 (10.3%)  |        |
|                                 | Visit 7  | No                        | 21 (70.0%) | 13 (44.8%) | 0.1711        | <b>Worse</b> than baseline  | 9 (30.0%)  | 13 (44.8%) | 0.4858 |
|                                 |          | Less than 1 per week      | 5 (16.7%)  | 10 (34.5%) |               | <b>Same</b> as baseline     | 15 (50.0%) | 12 (41.4%) |        |
|                                 |          | At least 1 per week       | 4 (13.3%)  | 6 (20.75)  |               | <b>Better</b> than baseline | 6 (20.0%)  | 4 (13.8%)  |        |

*P*-value by Fisher's exact test

**Table S2.** Comparison of inflammatory markers between the placebo and probiotic groups.

|               |                    | Placebo (n=31) |                       | Probiotics (n=29) |                       | P-value* | P-value** | P-value*** |
|---------------|--------------------|----------------|-----------------------|-------------------|-----------------------|----------|-----------|------------|
|               |                    | n              | Mean ( $\pm$ SD)      | n                 | Mean ( $\pm$ SD)      |          |           |            |
| GPS           | Baseline (Visit 2) | 31             | 0.23 ( $\pm$ 0.56)    | 27                | 0.04 ( $\pm$ 0.19)    | 0.1213   |           |            |
|               | Visit 4            | 31             | 1.61 ( $\pm$ 0.56)    | 29                | 1.48 ( $\pm$ 0.63)    | 0.4293   | 0.9516    | 0.7417     |
|               | Visit 5            | 30             | 1.77 ( $\pm$ 0.50)    | 28                | 1.50 ( $\pm$ 0.51)    | 0.0258   | 0.4820    | 0.6187     |
|               | Visit 6            | 31             | 0.10 ( $\pm$ 0.30)    | 29                | 0.03 ( $\pm$ 0.19)    | 0.3465   | 0.3342    | 0.2733     |
| WBC           | Baseline (Visit 2) | 31             | 6.97 ( $\pm$ 2.17)    | 29                | 6.14 ( $\pm$ 1.40)    | 0.0613   |           |            |
|               | Visit 4            | 31             | 9.33 ( $\pm$ 3.06)    | 29                | 9.29 ( $\pm$ 2.35)    | 0.8591   | 0.2640    | 0.2621     |
|               | Visit 5            | 31             | 7.17 ( $\pm$ 2.57)    | 29                | 6.73 ( $\pm$ 1.76)    | 0.6625   | 0.4159    | 0.5358     |
|               | Visit 6            | 31             | 6.82 ( $\pm$ 2.30)    | 29                | 5.76 ( $\pm$ 1.39)    | 0.0255   | 0.5740    | 0.6031     |
| Neutrophils   | Baseline (Visit 2) | 31             | 58.31 ( $\pm$ 11.74)  | 29                | 58.30 ( $\pm$ 8.16)   | 0.8359   |           |            |
|               | Visit 4            | 30             | 73.35 ( $\pm$ 7.69)   | 28                | 75.18 ( $\pm$ 6.92)   | 0.3751   | 0.4984    | 0.5168     |
|               | Visit 5            | 31             | 64.41 ( $\pm$ 9.06)   | 29                | 65.79 ( $\pm$ 9.94)   | 0.6412   | 0.5056    | 0.6412     |
|               | Visit 6            | 31             | 57.50 ( $\pm$ 7.96)   | 29                | 52.76 ( $\pm$ 9.72)   | 0.1134   | 0.1117    | 0.0601     |
| Lymphocytes   | Baseline (Visit 2) | 31             | 31.69 ( $\pm$ 9.73)   | 29                | 32.31 ( $\pm$ 7.18)   | 0.6896   |           |            |
|               | Visit 4            | 30             | 17.84 ( $\pm$ 6.54)   | 28                | 16.40 ( $\pm$ 6.03)   | 0.4692   | 0.3386    | 0.3946     |
|               | Visit 5            | 31             | 23.76 ( $\pm$ 7.92)   | 29                | 22.91 ( $\pm$ 8.68)   | 0.6359   | 0.4201    | 0.5650     |
|               | Visit 6            | 31             | 31.78 ( $\pm$ 7.05)   | 29                | 34.91 ( $\pm$ 7.88)   | 0.1430   | 0.4330    | 0.2798     |
| NLR           | Baseline (Visit 2) | 31             | 2.13 ( $\pm$ 1.06)    | 29                | 1.95 ( $\pm$ 0.73)    | 0.7843   |           |            |
|               | Visit 4            | 30             | 4.88 ( $\pm$ 2.46)    | 28                | 5.45 ( $\pm$ 2.61)    | 0.5034   | 0.2692    | 0.2398     |
|               | Visit 5            | 31             | 3.31 ( $\pm$ 2.09)    | 29                | 3.75 ( $\pm$ 2.94)    | 0.5892   | 0.4033    | 0.3339     |
|               | Visit 6            | 31             | 2.00 ( $\pm$ 1.02)    | 29                | 1.64 ( $\pm$ 0.65)    | 0.0771   | 0.5296    | 0.3868     |
| Monocytes     | Baseline (Visit 2) | 31             | 7.24 ( $\pm$ 2.72)    | 29                | 6.84 ( $\pm$ 1.76)    | 0.8014   |           |            |
|               | Visit 6            | 31             | 6.74 ( $\pm$ 2.18)    | 29                | 6.78 ( $\pm$ 1.61)    | 1.0000   | 0.8359    | 0.4863     |
| Plt count     | Baseline (Visit 2) | 31             | 259.61 ( $\pm$ 84.35) | 29                | 259.76 ( $\pm$ 58.96) | 0.7561   |           |            |
|               | Visit 6            | 31             | 324.52 ( $\pm$ 96.96) | 29                | 319.97 ( $\pm$ 94.36) | 0.9646   | 0.8824    | 0.8273     |
| Zonulin       | Baseline (Visit 2) | 31             | 3.32 ( $\pm$ 4.22)    | 29                | 4.73 ( $\pm$ 4.64)    | 0.0265   |           |            |
|               | Visit 6            | 31             | 2.94 ( $\pm$ 3.24)    | 28                | 2.10 ( $\pm$ 1.73)    | 0.8436   | 0.0877    | 0.0353     |
| IFN- $\gamma$ | Baseline (Visit 2) | 31             | 23.32 ( $\pm$ 44.42)  | 28                | 11.73 ( $\pm$ 7.37)   | 0.1349   |           |            |
|               | Visit 6            | 31             | 21.79 ( $\pm$ 29.07)  | 28                | 13.85 ( $\pm$ 7.19)   | 0.2984   | 0.5952    | 0.2202     |
| TNF- $\alpha$ | Baseline (Visit 2) | 31             | 17.15 ( $\pm$ 26.72)  | 28                | 13.90 ( $\pm$ 4.95)   | 0.3428   |           |            |

|       |                    |    |                       |    |                       |        |        |        |
|-------|--------------------|----|-----------------------|----|-----------------------|--------|--------|--------|
|       | Visit 6            | 31 | 15.10 ( $\pm 15.07$ ) | 28 | 13.57 ( $\pm 3.82$ )  | 0.2364 | 0.9939 | 0.4413 |
| IL-6  | Baseline (Visit 2) | 31 | 7.23 ( $\pm 11.75$ )  | 28 | 4.39 ( $\pm 2.51$ )   | 0.4299 |        |        |
|       | Visit 6            | 31 | 6.52 ( $\pm 6.90$ )   | 28 | 4.84 ( $\pm 2.77$ )   | 0.7788 | 0.7905 | 0.3752 |
| IL-10 | Baseline (Visit 2) | 31 | 38.30 ( $\pm 48.79$ ) | 28 | 21.57 ( $\pm 19.09$ ) | 0.1429 |        |        |
|       | Visit 6            | 31 | 38.61 ( $\pm 31.72$ ) | 28 | 27.72 ( $\pm 20.89$ ) | 0.1290 | 0.5487 | 0.1515 |

\*: *P*-value for the comparison of the two groups according to the Wilcoxon rank-sum test.

\*\**P*-value for the comparison of the difference in values between the two groups according to the Wilcoxon rank-sum test.

\*\*\*: *P*-value for group difference according to visit according to generalized estimating equations.

GPS, Glasgow Prognostic Score; WBC, white blood cell; IFN, interferon; TNF, tumor necrosis factor; IL, interleukin; Plt, platelet; NLR, neutrophil-lymphocyte ratio; SD, standard deviation.

**Table S3.** Operational taxonomic units (OTUs) for analyzed samples in participating patients according to visit.

|      | 01-Hospital |         |         |         | 02-Hospital |         |         |         | 03-Hospital |         |         |         | 04-Hospital |         |         |         |
|------|-------------|---------|---------|---------|-------------|---------|---------|---------|-------------|---------|---------|---------|-------------|---------|---------|---------|
|      | Visit 2     | Visit 3 | Visit 6 | Visit 7 | Visit 2     | Visit 3 | Visit 6 | Visit 7 | Visit 2     | Visit 3 | Visit 6 | Visit 7 | Visit 2     | Visit 3 | Visit 6 | Visit 7 |
| R001 | 550         | 1510    | 367     | 856     | 840         | 1377    | 601     | 928     | 729         | 1117    | 786     | 1295    | 805         | 1426    | 590     | 1186    |
| R002 | 686         | 1159    | 791     | 762     | 632         | 871     | 379     | -       | -           | -       | -       | -       | -           | -       | -       | -       |
| R003 | 596         | 961     | 1063    | 342     | 612         | 1022    | 407     | 866     | 646         | -       | 650     | 1346    | 941         | 1260    | 843     | 843     |
| R004 | 419         | 831     | 443     | 743     | -           | -       | -       | -       | 643         | 1088    | 624     | 1167    | 1332        | 320     | 704     | 1082    |
| R005 | 1042        | 1226    | 560     | 773     | -           | -       | -       | -       | 726         | -       | 869     | 474     | 750         | 1051    | 664     | 813     |
| R006 | 755         | 826     | 940     | 1432    | 994         | 1060    | 806     | 924     | 1120        | 1151    | 804     | 957     | 783         | 989     | 321     | 658     |
| R007 | 894         | 1042    | 572     | 710     | 821         | 921     | 1300    | 1202    | 504         | 705     | 544     | 421     | 1035        | 750     | 579     | 1611    |
| R008 | 662         | 1222    | 751     | 750     | 1101        | 1236    | 966     | 1083    | 706         | 753     | 866     | 466     | 1186        | 876     | 735     | 1134    |
| R009 | 675         | 1118    | 720     | 546     |             |         |         |         | 1030        | 1158    | -       | 642     | -           | -       | -       | -       |
| R010 | 1082        | -       | 883     | 845     |             |         |         |         | 2283        | 1523    | 989     | 706     | 1090        | 1069    | 1227    | 1201    |
| R011 | 690         | 912     | 654     | 616     |             |         |         |         | 515         | 324     | 530     | 608     | 1049        | 1185    | 872     | 1017    |
| R012 | 768         | 1152    | 530     | 941     |             |         |         |         | 1164        | 1040    | 1134    | 1309    | 592         | 672     | 828     | 855     |
| R013 | 287         | 537     | 488     | 488     |             |         |         |         | 1173        | 1218    | 866     | 726     | -           | -       | -       | -       |
| R014 | 1097        | 577     | 1031    | 811     |             |         |         |         | 770         | 669     | 190     | 400     | 942         | 735     | 1041    | 1185    |
| R015 | -           | -       | -       | -       |             |         |         |         | 849         | -       | 857     | 775     |             |         |         |         |
| R016 | 1394        | 1585    | 699     | 690     |             |         |         |         | 893         | 922     | 728     | 692     |             |         |         |         |
| R017 | 1086        | 1152    | 853     | 951     |             |         |         |         | 459         | 685     | 968     | 899     |             |         |         |         |
| R018 | -           | -       | -       | -       |             |         |         |         | 1240        | -       | 699     | 1047    |             |         |         |         |
| R019 | 506         | 716     | 1167    | 1131    |             |         |         |         | 527         | 727     | 592     | 587     |             |         |         |         |
| R020 | 827         | 926     | 760     | 905     |             |         |         |         | 1096        | 1198    | 598     | 364     |             |         |         |         |
| R021 | 1766        | 1043    | 645     | 428     |             |         |         |         | 1040        | 1560    | 712     | 561     |             |         |         |         |
| R022 | 1145        | 1242    | 553     | 165     |             |         |         |         | 1047        | 1257    | 1210    | 863     |             |         |         |         |
| R023 |             |         |         |         |             |         |         |         | -           | 1353    | 1098    | 1205    |             |         |         |         |

**Figure S1.** Compositional changes in the phylum level of bacteria in both groups according to visit.

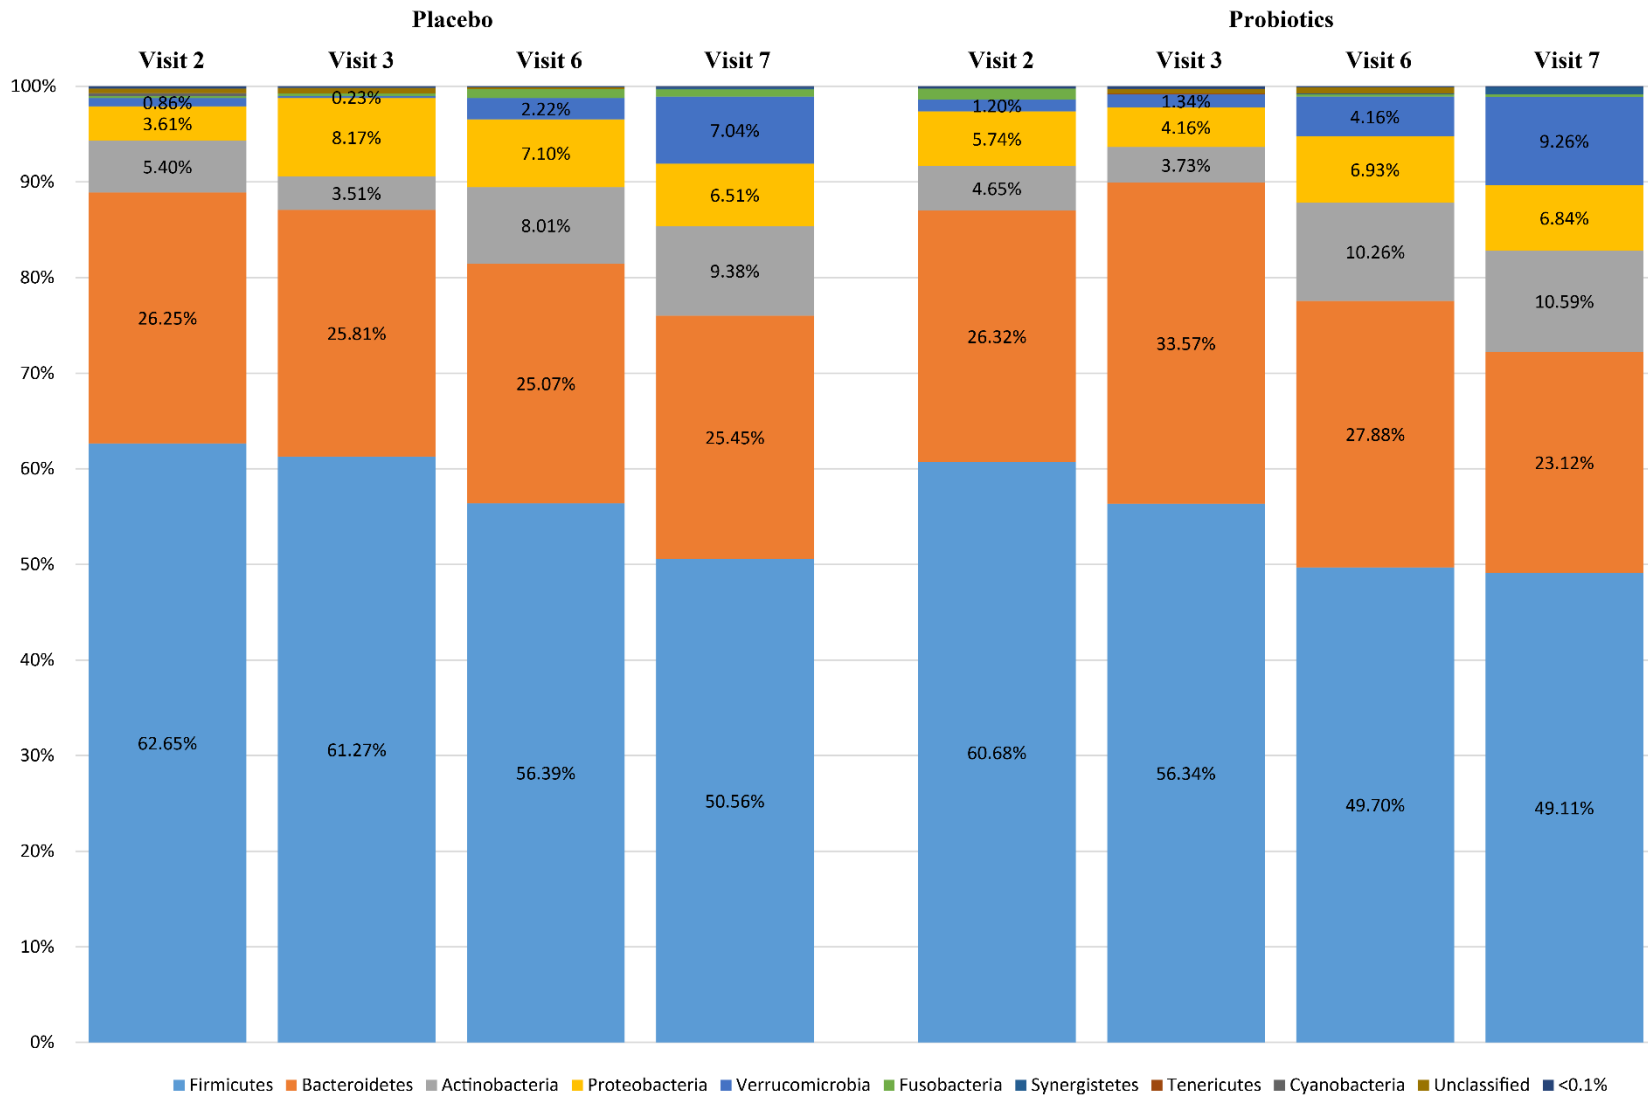

**Figure S2.** Compositional changes in the genus of bacteria in both groups according to visits.

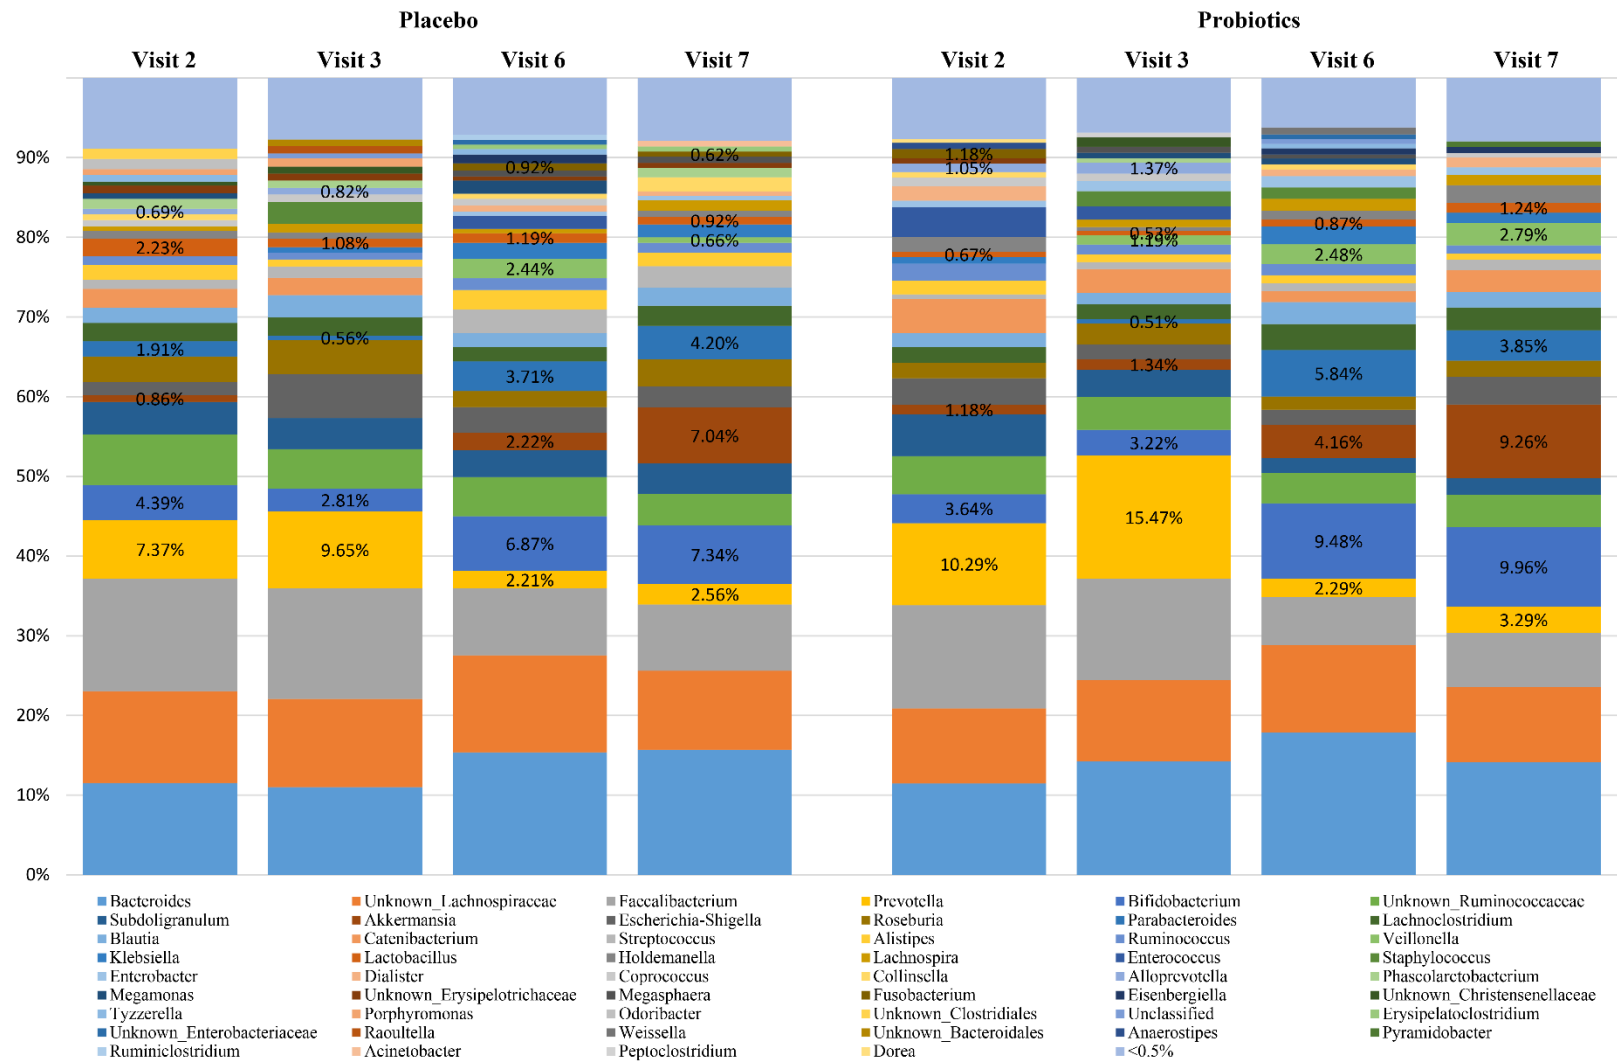



Figure S3. Correlation between metabolites and analyzed bacteria in each group.

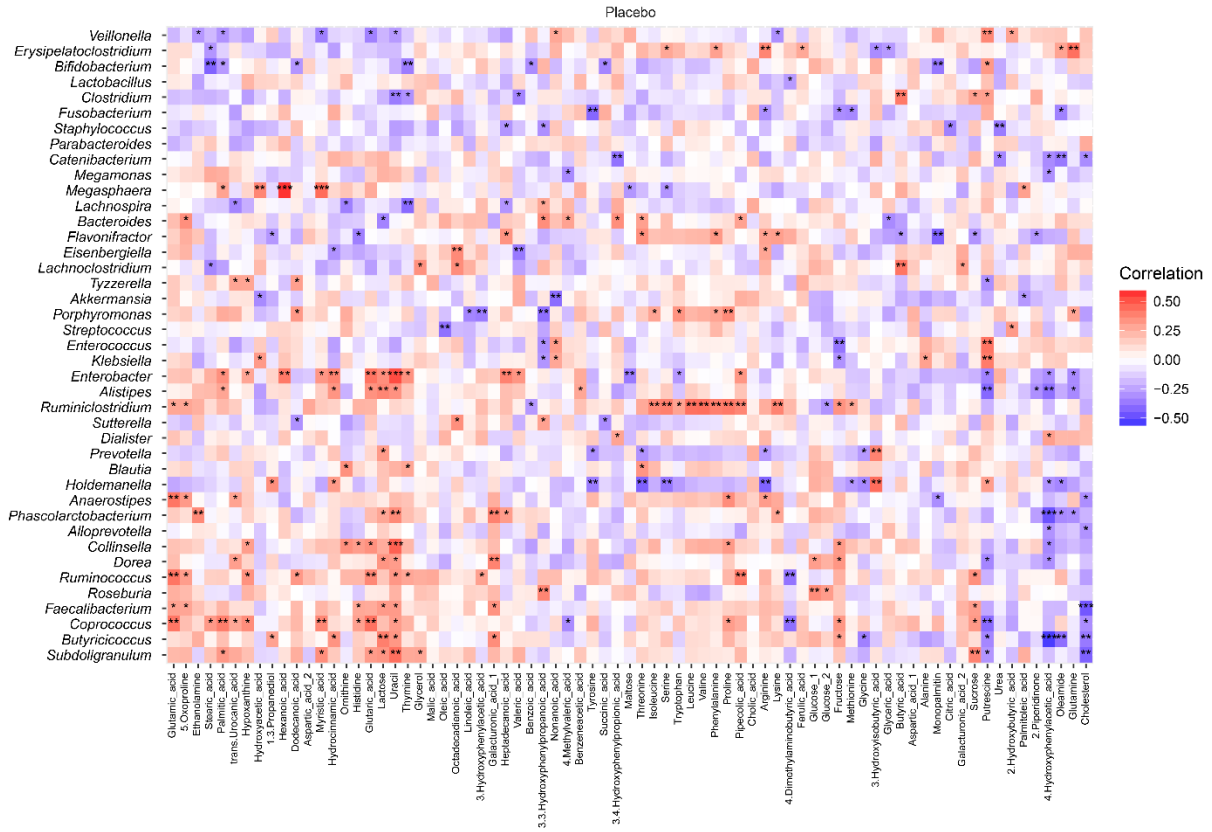

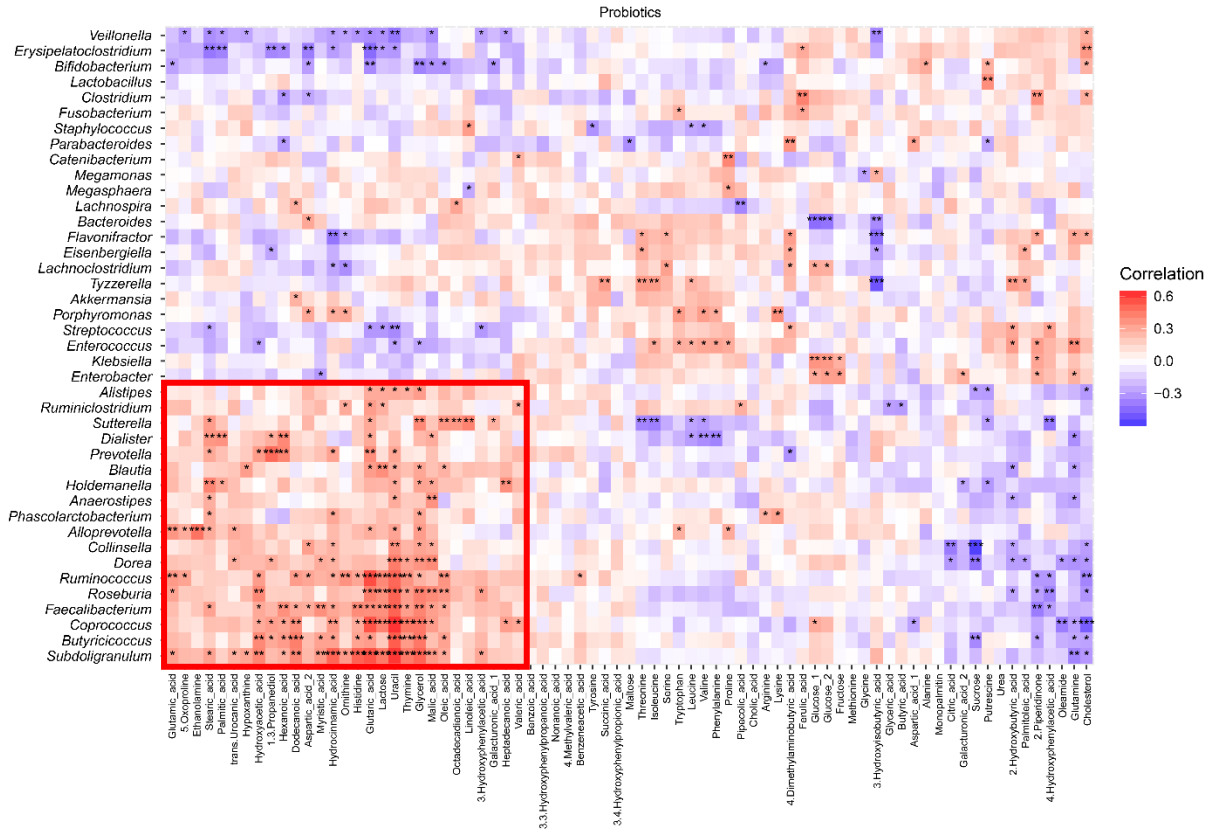

Supplement: s1 [file s1]
